# Supplementary material for: Dose-Related Mutagenic and Clastogenic Effects of Benzo[b]fluoranthene in Mouse Somatic Tissues Detected by Duplex Sequencing and the Micronucleus Assay
Source: PubMed Central journal article supplement — Environ Sci Technol. 2024 Nov 27;58(49):21450–63. doi: 10.1021/acs.est.4c07236 (PMC11636207; doi:10.1021/acs.est.4c07236), 2024-11-27
Supplement: es4c07236_si_001.pdf [file es4c07236_si_001.pdf]

1 **Supporting Information:**

2 **Dose-related Mutagenic and Clastogenic Effects of**  
3 **Benzo[b]fluoranthene in Mouse Somatic Tissues Detected by Duplex**  
4 **Sequencing and the Micronucleus Assay**

5

6 David M. Schuster<sup>1,2</sup>, Danielle P. M. LeBlanc<sup>2</sup>, Gu Zhou<sup>2</sup>, Matthew J. Meier<sup>2</sup>, Annette E. Dodge<sup>1</sup>,  
7 Paul A. White<sup>2,1</sup>, Alexandra S. Long<sup>3</sup>, Andrew Williams<sup>2</sup>, Cheryl Hobbs<sup>4</sup>, Alex Diesing<sup>4</sup>, Stephanie  
8 L. Smith-Roe<sup>5</sup>, Jesse J. Salk<sup>6</sup>, Francesco Marchetti<sup>2,7\*</sup>, Carole L. Yauk<sup>1\*</sup>

9 <sup>1</sup>Department of Biology, University of Ottawa, Ottawa, Canada

10 <sup>2</sup>Environmental Health Science and Research Bureau, Health Canada, Ottawa, Canada

11 <sup>3</sup>Existing Substances Risk Assessment Bureau, Health Canada, Ottawa, Canada

12 <sup>4</sup>Integrated Laboratory Systems, LLC, an Inotiv Company, Research Triangle Park, NC, USA

13 <sup>5</sup>Division of Translational Toxicology, National Institute of Environmental Health Sciences,  
14 Research Triangle Park, NC, USA

15 <sup>6</sup>University of Washington School of Medicine, Department of Medicine, Division of Hematology  
16 and Oncology

17 <sup>7</sup>Department of Biology, Carleton University, Ottawa, Canada

18

19 \*Correspondence to [carole.yauk@uottawa.ca](mailto:carole.yauk@uottawa.ca) and [francesco.marchetti@hc-sc.gc.ca](mailto:francesco.marchetti@hc-sc.gc.ca)

20

21 **Supporting information overview:**

22 **Number of pages: 11**

23 **Number of tables: 8**

24 **Number of figures: 2**

25

1 **Table S1.** Peripheral blood micronucleus assay conducted 2 days after 28 days of oral exposure to BbF.  
2

| BbF Dose<br>(mg/kg/day) | n | MN-RET <sup>1</sup> /1000 ±<br>SEM | Adj. <i>p</i><br>value <sup>2</sup> | MN-RBC <sup>3</sup> /1000 ±<br>SEM | Adj. <i>p</i><br>value <sup>2</sup> | %RET ±<br>SEM | Adj. <i>p</i><br>value <sup>2</sup> |
|-------------------------|---|------------------------------------|-------------------------------------|------------------------------------|-------------------------------------|---------------|-------------------------------------|
| 0                       | 8 | 2.34 ± 0.1                         | -                                   | 1.63 ± 0.1                         | -                                   | 1.60 ± 0.1    |                                     |
| 6.25                    | 8 | 4.16 ± 0.4                         | 0.0036                              | 2.56 ± 0.2                         | 0.0014                              | 1.81 ± 0.1    | 0.5763                              |
| 12.5                    | 8 | 5.31 ± 0.3                         | <0.0001                             | 3.00 ± 0.1                         | <0.0001                             | 1.87 ± 0.1    | 0.2245                              |
| 25                      | 8 | 5.26 ± 0.4                         | <0.0001                             | 3.00 ± 0.2                         | <0.0001                             | 2.02 ± 0.1    | 0.0146                              |
| 50                      | 8 | 6.52 ± 0.3                         | <0.0001                             | 3.90 ± 0.1                         | <0.0001                             | 2.24 ± 0.1    | <0.0001                             |
| 100                     | 8 | 8.11 ± 0.4                         | <0.0001                             | 4.84 ± 0.2                         | <0.0001                             | 2.17 ± 0.1    | 0.0005                              |

3 <sup>1</sup>Micronucleated reticulocytes.

4 <sup>2</sup>Pairwise comparison to 0 mg/kg/day BbF using the Bonferroni multiple comparison test, significant if *p* < 0.05.

5 <sup>3</sup>Micronucleated red blood cells.

**Table S2.** Technical performance metrics of the libraries built on DNA from BM and liver from animals after exposure to BbF.

| BbF Dose<br>(mg/kg/day) | Animal<br>Number | Raw Reads<br>Passing<br>Filter | Median Insert<br>Size | Mean Duplex<br>Depth | Peak Tag<br>Family<br>Size | Informative<br>Duplex<br>Bases | Raw Reads<br>Passing<br>Filter | Median Insert<br>Size | Mean Duplex<br>Depth | Peak Tag<br>Family<br>Size | Informative<br>Duplex<br>Bases |
|-------------------------|------------------|--------------------------------|-----------------------|----------------------|----------------------------|--------------------------------|--------------------------------|-----------------------|----------------------|----------------------------|--------------------------------|
| Bone Marrow             |                  |                                |                       |                      |                            | Liver                          |                                |                       |                      |                            |                                |
| 0                       | 1                | 3.12 <sup>+08</sup>            | 299                   | 15,550               | 14                         | 1.17 <sup>+09</sup>            | 2.46 <sup>+08</sup>            | 252                   | 16,764               | 13                         | 1.04 <sup>+09</sup>            |
| 0                       | 2                | 3.01 <sup>+08</sup>            | 269                   | 17,271               | 11                         | 1.34 <sup>+09</sup>            | 6.81 <sup>+08</sup>            | 267                   | 17,433               | 40                         | 1.07 <sup>+09</sup>            |
| 0                       | 3                | 3.25 <sup>+08</sup>            | 285                   | 15,948               | 14                         | 1.22 <sup>+09</sup>            | 2.53 <sup>+08</sup>            | 276                   | 19,600               | 11                         | 1.18 <sup>+09</sup>            |
| 0                       | 4                | 3.73 <sup>+08</sup>            | 249                   | 18,109               | 13                         | 1.47 <sup>+09</sup>            | 2.73 <sup>+08</sup>            | 259                   | 19,867               | 12                         | 1.23 <sup>+09</sup>            |
| 6.25                    | 5                | 3.42 <sup>+08</sup>            | 292                   | 13,438               | 19                         | 1.00 <sup>+09</sup>            | 5.19 <sup>+08</sup>            | 268                   | 25,014               | 20                         | 1.53 <sup>+09</sup>            |
| 6.25                    | 6                | 7.06 <sup>+08</sup>            | 425                   | 10,718               | 63                         | 7.06 <sup>+08</sup>            | 2.10 <sup>+08</sup>            | 248                   | 16,886               | 9                          | 1.05 <sup>+09</sup>            |
| 6.25                    | 7                | 3.02 <sup>+08</sup>            | 311                   | 12,297               | 19                         | 9.08 <sup>+08</sup>            | 2.78 <sup>+08</sup>            | 276                   | 16,524               | 18                         | 9.60 <sup>+08</sup>            |
| 6.25                    | 8                | 2.40 <sup>+08</sup>            | 278                   | 14,593               | 9                          | 1.11 <sup>+09</sup>            | 2.43 <sup>+08</sup>            | 261                   | 18,443               | 10                         | 1.13 <sup>+09</sup>            |
| 12.5                    | 9                | 3.20 <sup>+08</sup>            | 271                   | 19,131               | 10                         | 1.47 <sup>+09</sup>            | 4.99 <sup>+08</sup>            | 261                   | 26,398               | 19                         | 1.63 <sup>+09</sup>            |
| 12.5                    | 10               | 5.42 <sup>+08</sup>            | 308                   | 14,064               | 29                         | 1.07 <sup>+09</sup>            | 3.70 <sup>+08</sup>            | 248                   | 23,489               | 13                         | 1.49 <sup>+09</sup>            |
| 12.5                    | 11               | 3.48 <sup>+08</sup>            | 276                   | 18,558               | 12                         | 1.43 <sup>+09</sup>            | 4.72 <sup>+08</sup>            | 261                   | 23,011               | 20                         | 1.44 <sup>+09</sup>            |
| 12.5                    | 12               | 2.30 <sup>+08</sup>            | 284                   | 13,785               | 10                         | 1.04 <sup>+09</sup>            | 3.55 <sup>+08</sup>            | 272                   | 21,224               | 16                         | 1.28 <sup>+09</sup>            |
| 25                      | 13               | 3.56 <sup>+08</sup>            | 276                   | 19,780               | 11                         | 1.52 <sup>+09</sup>            | 3.14 <sup>+08</sup>            | 268                   | 21,397               | 13                         | 1.30 <sup>+09</sup>            |
| 25                      | 14               | 2.21 <sup>+08</sup>            | 279                   | 14,154               | 9                          | 1.06 <sup>+09</sup>            | 4.34 <sup>+08</sup>            | 286                   | 22,006               | 20                         | 1.33 <sup>+09</sup>            |
| 25                      | 15               | 3.34 <sup>+08</sup>            | 319                   | 11,071               | 22                         | 8.31 <sup>+08</sup>            | 3.34 <sup>+08</sup>            | 267                   | 17,970               | 18                         | 1.10 <sup>+09</sup>            |
| 25                      | 16               | 4.57 <sup>+08</sup>            | 220                   | 19,177               | 15                         | 1.62 <sup>+09</sup>            | 2.65 <sup>+08</sup>            | 202                   | 15,613               | 9                          | 1.10 <sup>+09</sup>            |
| 50                      | 17               | 2.40 <sup>+08</sup>            | 273                   | 14,280               | 11                         | 1.10 <sup>+09</sup>            | 2.64 <sup>+08</sup>            | 268                   | 21,146               | 10                         | 1.28 <sup>+09</sup>            |
| 50                      | 18               | 3.71 <sup>+08</sup>            | 251                   | 19,331               | 12                         | 1.55 <sup>+09</sup>            | 3.12 <sup>+08</sup>            | 255                   | 22,785               | 12                         | 1.39 <sup>+09</sup>            |
| 50                      | 19               | 4.03 <sup>+08</sup>            | 294                   | 13,726               | 21                         | 1.04 <sup>+09</sup>            | 3.60 <sup>+08</sup>            | 254                   | 21,148               | 16                         | 1.31 <sup>+09</sup>            |
| 50                      | 20               | 3.02 <sup>+08</sup>            | 268                   | 16,705               | 12                         | 1.27 <sup>+09</sup>            | 4.06 <sup>+08</sup>            | 275                   | 19,002               | 21                         | 1.17 <sup>+09</sup>            |
| 100                     | 21               | 3.38 <sup>+08</sup>            | 230                   | 16,505               | 9                          | 1.39 <sup>+09</sup>            | 3.40 <sup>+08</sup>            | 286                   | 19,003               | 17                         | 1.15 <sup>+09</sup>            |
| 100                     | 22               | 2.38 <sup>+08</sup>            | 266                   | 13,861               | 11                         | 1.06 <sup>+09</sup>            | 3.80 <sup>+08</sup>            | 253                   | 24,706               | 14                         | 1.54 <sup>+09</sup>            |
| 100                     | 23               | 4.56 <sup>+08</sup>            | 282                   | 21,661               | 14                         | 1.67 <sup>+09</sup>            | 2.76 <sup>+08</sup>            | 236                   | 19,811               | 11                         | 1.26 <sup>+09</sup>            |
| 100                     | 24               | 2.85 <sup>+08</sup>            | 271                   | 16,844               | 10                         | 1.30 <sup>+09</sup>            | 4.81 <sup>+08</sup>            | 249                   | 21,772               | 21                         | 1.39 <sup>+09</sup>            |

**Table S3.** Minimum mutation frequencies by duplex sequencing using the mouse mutagenesis panel in bone marrow and liver samples after exposure to increasing doses of BbF.

| BbF Dose (mg/kg/day) | n | MF <sub>min</sub> <sup>1</sup> ± SEM (×10 <sup>-8</sup> ) | Adj. <i>p</i> value <sup>2</sup> | MF <sub>min</sub> Fold-change <sup>3</sup> |
|----------------------|---|-----------------------------------------------------------|----------------------------------|--------------------------------------------|
| Bone Marrow          |   |                                                           |                                  |                                            |
| 0                    | 4 | 4.13 ± 0.45                                               | -                                | -                                          |
| 6.25                 | 4 | 5.65 ± 0.59                                               | 0.6271                           | 1.4                                        |
| 12.5                 | 4 | 7.54 ± 0.58                                               | 0.0052                           | 1.8                                        |
| 25                   | 4 | 7.95 ± 0.60                                               | 0.0025                           | 1.9                                        |
| 50                   | 4 | 11.66 ± 0.72                                              | <0.0001                          | 2.8                                        |
| 100                  | 4 | 14.78 ± 0.76                                              | <0.0001                          | 3.6                                        |
| Liver                |   |                                                           |                                  |                                            |
| 0                    | 4 | 5.33 ± 1.01                                               | -                                | -                                          |
| 6.25                 | 4 | 5.88 ± 1.05                                               | 0.9807                           | 1.1                                        |
| 12.5                 | 4 | 8.06 ± 1.10                                               | 0.3567                           | 1.5                                        |
| 25                   | 4 | 11.12 ± 1.43                                              | 0.0378                           | 2.1                                        |
| 50                   | 4 | 22.23 ± 1.94                                              | <0.0001                          | 4.2                                        |
| 100                  | 4 | 36.27 ± 2.49                                              | <0.0001                          | 6.8                                        |

<sup>1</sup> Minimum mutation frequency considering unique mutations.

<sup>2</sup> Pairwise comparison to 0 mg/kg/day BbF by GLM, significant if *p* < 0.05.

<sup>3</sup> Fold-change of minimum mutation frequency versus 0 mg/kg/day BbF.

**Table S4.** Minimum and maximum mutation frequencies in bone marrow and liver samples from individual animals after exposure to increasing doses of BbF.

| BbF Dose (mg/kg/day) | Animal | MF <sub>min</sub> <sup>1</sup> | MF <sub>max</sub> <sup>2</sup> | Fold-change <sup>3</sup> | MF <sub>min</sub> <sup>1</sup> | MF <sub>max</sub> <sup>2</sup> | Fold-change <sup>3</sup> |
|----------------------|--------|--------------------------------|--------------------------------|--------------------------|--------------------------------|--------------------------------|--------------------------|
|                      |        | (×10 <sup>-8</sup> )           | (×10 <sup>-8</sup> )           |                          | (×10 <sup>-8</sup> )           | (×10 <sup>-8</sup> )           |                          |
|                      |        | Bone marrow                    |                                |                          | Liver                          |                                |                          |
| 0                    | 1      | 4.51                           | 5.24                           | 1.2                      | 6.32                           | 6.75                           | 1.1                      |
| 0                    | 2      | 3.87                           | 4.10                           | 1.1                      | 6.61                           | 12.0                           | 1.8                      |
| 0                    | 3      | 4.04                           | 4.16                           | 1.0                      | 5.01                           | 5.75                           | 1.1                      |
| 0                    | 4      | 4.09                           | 4.51                           | 1.1                      | 3.39                           | 3.39                           | 1.0                      |
| 6.25                 | 5      | 4.51                           | 5.36                           | 1.2                      | 6.72                           | 7.87                           | 1.2                      |
| 6.25                 | 6      | 9.29                           | 33.3                           | 3.6                      | 5.70                           | 8.26                           | 1.4                      |
| 6.25                 | 7      | 4.15                           | 4.30                           | 1.0                      | 4.60                           | 4.75                           | 1.0                      |
| 6.25                 | 8      | 4.63                           | 5.69                           | 1.2                      | 6.51                           | 6.51                           | 1.0                      |
| 12.5                 | 9      | 6.72                           | 7.53                           | 1.1                      | 8.38                           | 8.65                           | 1.0                      |
| 12.5                 | 10     | 9.49                           | 16.8                           | 1.8                      | 8.74                           | 10.9                           | 1.2                      |
| 12.5                 | 11     | 7.38                           | 8.20                           | 1.1                      | 7.11                           | 7.53                           | 1.1                      |
| 12.5                 | 12     | 6.58                           | 7.14                           | 1.1                      | 8.02                           | 8.92                           | 1.1                      |
| 25                   | 13     | 6.38                           | 7.06                           | 1.1                      | 9.97                           | 10.5                           | 1.1                      |
| 25                   | 14     | 8.20                           | 9.98                           | 1.2                      | 11.1                           | 12.9                           | 1.2                      |
| 25                   | 15     | 8.34                           | 8.85                           | 1.1                      | 11.4                           | 11.9                           | 1.0                      |
| 25                   | 16     | 8.88                           | 9.77                           | 1.1                      | 12.0                           | 12.0                           | 1.0                      |
| 50                   | 17     | 9.63                           | 11.2                           | 1.2                      | 22.1                           | 22.3                           | 1.0                      |
| 50                   | 18     | 12.0                           | 13.3                           | 1.1                      | 29.0                           | 32.0                           | 1.1                      |
| 50                   | 19     | 14.4                           | 16.6                           | 1.2                      | 15.4                           | 15.5                           | 1.0                      |
| 50                   | 20     | 10.6                           | 11.7                           | 1.1                      | 22.4                           | 23.1                           | 1.0                      |
| 100                  | 21     | 16.6                           | 20.5                           | 1.2                      | 31.5                           | 33.9                           | 1.1                      |
| 100                  | 22     | 15.9                           | 19.1                           | 1.2                      | 48.5                           | 58.0                           | 1.2                      |
| 100                  | 23     | 13.1                           | 15.4                           | 1.2                      | 32.1                           | 33.2                           | 1.0                      |
| 100                  | 24     | 13.5                           | 15.5                           | 1.2                      | 33.0                           | 33.9                           | 1.0                      |

<sup>1</sup> Minimum mutation frequency considering unique mutations.<sup>2</sup> Maximum mutation frequency considering all detected mutations.<sup>3</sup> Fold-change between MF<sub>min</sub> and MF<sub>max</sub>

**Table S5.** Minimum mutation frequencies per loci detected in bone marrow samples after exposure to increasing doses of BbF.

| Location of locus | 0 mg/kg/day                                                | 6.25 mg/kg/day                                             |                          |                                  | 12.5 mg/kg/day                                             |                          |                                  | 25 mg/kg/day                                               |                          |                                  | 50 mg/kg/day                                               |                          |                                  | 100 mg/kg/day                                              |                          |                                  |
|-------------------|------------------------------------------------------------|------------------------------------------------------------|--------------------------|----------------------------------|------------------------------------------------------------|--------------------------|----------------------------------|------------------------------------------------------------|--------------------------|----------------------------------|------------------------------------------------------------|--------------------------|----------------------------------|------------------------------------------------------------|--------------------------|----------------------------------|
|                   | MF <sub>min</sub> <sup>1</sup> ± SEM (x 10 <sup>-8</sup> ) | MF <sub>min</sub> <sup>1</sup> ± SEM (x 10 <sup>-8</sup> ) | Fold-change <sup>2</sup> | Adj. <i>p</i> value <sup>3</sup> | MF <sub>min</sub> <sup>1</sup> ± SEM (x 10 <sup>-8</sup> ) | Fold-change <sup>2</sup> | Adj. <i>p</i> value <sup>3</sup> | MF <sub>min</sub> <sup>1</sup> ± SEM (x 10 <sup>-8</sup> ) | Fold-change <sup>2</sup> | Adj. <i>p</i> value <sup>3</sup> | MF <sub>min</sub> <sup>1</sup> ± SEM (x 10 <sup>-8</sup> ) | Fold-change <sup>2</sup> | Adj. <i>p</i> value <sup>3</sup> | MF <sub>min</sub> <sup>1</sup> ± SEM (x 10 <sup>-8</sup> ) | Fold-change <sup>2</sup> | Adj. <i>p</i> value <sup>3</sup> |
| Chr1              | 5.91 ± 1.69                                                | 15.51 ± 7.44                                               | 2.6                      | 0.9986                           | 9.07 ± 4.70                                                | 1.5                      | 0.9994                           | 5.14 ± 2.01                                                | 0.9                      | 0.7675                           | 7.18 ± 1.94                                                | 1.2                      | 0.3633                           | 9.18 ± 1.77                                                | 1.6                      | 0.4251                           |
| Chr1.2            | 2.94 ± 1.12                                                | 2.31 ± 0.78                                                | 0.8                      | 0.1287                           | 2.46 ± 1.19                                                | 0.8                      | 0.9299                           | 5.02 ± 1.21                                                | 1.7                      | 1.0000                           | 7.46 ± 1.98                                                | 2.5                      | 0.9920                           | 6.84 ± 0.83                                                | 2.3                      | 0.6902                           |
| Chr2              | 3.77 ± 1.63                                                | 5.72 ± 1.86                                                | 1.5                      | 0.9564                           | 2.35 ± 1.58                                                | 0.6                      | 0.9809                           | 4.16 ± 1.48                                                | 1.1                      | 0.9983                           | 3.64 ± 1.50                                                | 1.0                      | 1.0000                           | 11.54 ± 1.40                                               | 3.1                      | 0.0742                           |
| Chr3              | 2.29 ± 0.98                                                | 3.17 ± 1.41                                                | 1.4                      | 0.9980                           | 5.80 ± 2.70                                                | 2.5                      | 0.4562                           | 7.27 ± 3.49                                                | 3.2                      | 0.4201                           | 6.00 ± 1.56                                                | 2.6                      | 0.4289                           | 3.80 ± 0.72                                                | 1.7                      | 0.9053                           |
| Chr4              | 2.24 ± 0.87                                                | 7.07 ± 1.16                                                | 3.2                      | 0.3101                           | 4.97 ± 0.45                                                | 2.2                      | 0.7340                           | 5.85 ± 1.50                                                | 2.6                      | 0.4198                           | 13.75 ± 4.23                                               | 6.1                      | 0.0069                           | 13.28 ± 3.32                                               | 5.9                      | 0.0090                           |
| Chr5              | 4.53 ± 1.93                                                | 4.45 ± 1.85                                                | 1.0                      | 1.0000                           | 13.26 ± 4.01                                               | 2.9                      | 0.0863                           | 7.37 ± 2.46                                                | 1.6                      | 0.7349                           | 13.73 ± 1.97                                               | 3.0                      | 0.0421                           | 13.21 ± 2.11                                               | 2.9                      | 0.0500                           |
| Chr6              | 1.60 ± 0.98                                                | 3.77 ± 1.55                                                | 2.4                      | 0.7973                           | 2.85 ± 1.22                                                | 1.8                      | 0.9495                           | 4.31 ± 1.68                                                | 2.7                      | 0.5109                           | 8.06 ± 3.37                                                | 5.0                      | 0.0654                           | 8.29 ± 2.04                                                | 5.2                      | 0.0436                           |
| Chr7              | 3.70 ± 1.29                                                | 3.22 ± 1.24                                                | 0.9                      | 1.0000                           | 1.51 ± 0.90                                                | 0.4                      | 0.7279                           | 5.09 ± 0.86                                                | 1.4                      | 0.9386                           | 7.80 ± 1.21                                                | 2.1                      | 0.3573                           | 8.60 ± 2.30                                                | 2.3                      | 0.2542                           |
| Chr8              | 5.91 ± 1.29                                                | 10.13 ± 1.20                                               | 1.7                      | 0.7182                           | 12.41 ± 2.23                                               | 2.1                      | 0.3124                           | 14.86 ± 4.91                                               | 2.5                      | 0.1643                           | 28.10 ± 4.90                                               | 4.8                      | 0.0002                           | 34.73 ± 10.20                                              | 5.9                      | <0.0001                          |
| Chr9              | 3.92 ± 1.01                                                | 5.33 ± 1.84                                                | 1.4                      | 0.9921                           | 9.76 ± 4.34                                                | 2.5                      | 0.1480                           | 10.51 ± 4.60                                               | 2.7                      | 0.2436                           | 16.73 ± 3.36                                               | 4.3                      | 0.0041                           | 15.30 ± 0.98                                               | 3.9                      | 0.0063                           |
| Chr10             | 1.09 ± 0.63                                                | 4.89 ± 1.66                                                | 4.5                      | 0.2420                           | 5.63 ± 1.40                                                | 5.2                      | 0.1632                           | 3.93 ± 1.46                                                | 3.6                      | 0.4414                           | 5.74 ± 1.33                                                | 5.3                      | 0.1565                           | 5.81 ± 1.68                                                | 5.3                      | 0.1482                           |
| Chr11             | 8.94 ± 2.77                                                | 7.46 ± 1.25                                                | 0.8                      | 0.9979                           | 16.05 ± 1.77                                               | 1.8                      | 0.2784                           | 25.68 ± 5.33                                               | 2.9                      | 0.0052                           | 31.80 ± 2.76                                               | 3.6                      | 0.0001                           | 35.18 ± 6.74                                               | 3.9                      | <0.0001                          |
| Chr12             | 3.22 ± 1.01                                                | 2.12 ± 1.24                                                | 0.7                      | 0.9872                           | 4.78 ± 2.07                                                | 1.5                      | 0.9858                           | 5.15 ± 1.51                                                | 1.6                      | 0.8300                           | 9.50 ± 2.74                                                | 3.0                      | 0.0796                           | 7.48 ± 0.89                                                | 2.3                      | 0.3355                           |
| Chr13             | 4.31 ± 1.94                                                | 5.45 ± 5.45                                                | 1.3                      | 1.0000                           | 5.90 ± 1.55                                                | 1.4                      | 0.9614                           | 4.61 ± 0.94                                                | 1.1                      | 1.0000                           | 4.18 ± 1.72                                                | 1.0                      | 1.0000                           | 4.41 ± 1.92                                                | 1.0                      | 1.0000                           |
| Chr14             | 4.61 ± 1.34                                                | 4.55 ± 0.78                                                | 1.0                      | 1.0000                           | 14.40 ± 0.89                                               | 3.1                      | 0.0308                           | 17.88 ± 2.20                                               | 3.9                      | 0.0047                           | 20.73 ± 4.02                                               | 4.5                      | 0.0009                           | 37.50 ± 3.58                                               | 8.1                      | <0.0001                          |
| Chr15             | 1.57 ± 0.53                                                | 1.44 ± 0.85                                                | 0.9                      | 1.0000                           | 2.88 ± 0.80                                                | 1.8                      | 0.9575                           | 2.02 ± 0.76                                                | 1.3                      | 0.9957                           | 3.99 ± 1.24                                                | 2.5                      | 0.6720                           | 5.12 ± 1.88                                                | 3.3                      | 0.3162                           |
| Chr16             | 10.00 ± 1.88                                               | 7.31 ± 1.70                                                | 0.7                      | 0.9444                           | 14.49 ± 3.40                                               | 1.4                      | 0.7512                           | 18.50 ± 1.54                                               | 1.9                      | 0.2331                           | 20.18 ± 2.70                                               | 2.0                      | 0.1190                           | 30.38 ± 6.63                                               | 3.0                      | 0.0020                           |
| Chr17             | 6.23 ± 2.19                                                | 12.11 ± 2.72                                               | 1.9                      | 0.4845                           | 15.40 ± 2.14                                               | 2.5                      | 0.0863                           | 6.47 ± 1.40                                                | 1.0                      | 1.0000                           | 14.82 ± 3.87                                               | 2.4                      | 0.1516                           | 34.70 ± 3.78                                               | 5.6                      | <0.0001                          |
| Chr18             | 3.87 ± 1.68                                                | 5.34 ± 0.99                                                | 1.4                      | 0.9899                           | 7.78 ± 1.73                                                | 2.0                      | 0.6284                           | 6.34 ± 2.01                                                | 1.6                      | 0.8538                           | 5.70 ± 0.70                                                | 1.5                      | 0.9361                           | 14.53 ± 1.48                                               | 3.8                      | 0.0108                           |
| Chr19             | 3.42 ± 0.70                                                | 3.92 ± 1.65                                                | 1.1                      | 0.9999                           | 3.16 ± 1.25                                                | 0.9                      | 1.0000                           | 3.64 ± 1.31                                                | 1.1                      | 1.0000                           | 9.96 ± 4.14                                                | 2.9                      | 0.1563                           | 9.08 ± 2.99                                                | 2.7                      | 0.2403                           |

<sup>1</sup> Minimum mutation frequency considering unique mutations within a respective locus.

<sup>2</sup> Fold-change of minimum mutation frequency versus 0 mg/kg/day BbF.

<sup>3</sup> Pairwise comparison to 0 mg/kg/day BbF of the respective locus by GLMM, significant if *p* < 0.05.

**Table S6.** Minimum mutation frequencies per loci detected in liver samples after exposure to increasing doses of BbF.

| Location of locus | 0 mg/kg/day                                                | 6.25 mg/kg/day                                             |                          |                                  | 12.5 mg/kg/day                                             |                          |                                  | 25 mg/kg/day                                               |                          |                                  | 50 mg/kg/day                                               |                          |                                  | 100 mg/kg/day                                              |                          |                                  |
|-------------------|------------------------------------------------------------|------------------------------------------------------------|--------------------------|----------------------------------|------------------------------------------------------------|--------------------------|----------------------------------|------------------------------------------------------------|--------------------------|----------------------------------|------------------------------------------------------------|--------------------------|----------------------------------|------------------------------------------------------------|--------------------------|----------------------------------|
|                   | MF <sub>min</sub> <sup>1</sup> ± SEM (x 10 <sup>-8</sup> ) | MF <sub>min</sub> <sup>1</sup> ± SEM (x 10 <sup>-8</sup> ) | Fold-change <sup>2</sup> | Adj. <i>p</i> value <sup>3</sup> | MF <sub>min</sub> <sup>1</sup> ± SEM (x 10 <sup>-8</sup> ) | Fold-change <sup>2</sup> | Adj. <i>p</i> value <sup>3</sup> | MF <sub>min</sub> <sup>1</sup> ± SEM (x 10 <sup>-8</sup> ) | Fold-change <sup>2</sup> | Adj. <i>p</i> value <sup>3</sup> | MF <sub>min</sub> <sup>1</sup> ± SEM (x 10 <sup>-8</sup> ) | Fold-change <sup>2</sup> | Adj. <i>p</i> value <sup>3</sup> | MF <sub>min</sub> <sup>1</sup> ± SEM (x 10 <sup>-8</sup> ) | Fold-change <sup>2</sup> | Adj. <i>p</i> value <sup>3</sup> |
| Chr1              | 2.77 ± 1.20                                                | 3.96 ± 1.63                                                | 1.4                      | 0.9412                           | 8.72 ± 2.22                                                | 3.1                      | 0.0679                           | 12.09 ± 2.21                                               | 4.4                      | 0.0147                           | 27.15 ± 7.81                                               | 9.8                      | < 0.0001                         | 41.48 ± 4.59                                               | 15.0                     | <0.0001                          |
| Chr1.2            | 9.80 ± 5.52                                                | 8.92 ± 1.54                                                | 0.9                      | 1.0000                           | 12.93 ± 3.08                                               | 1.3                      | 0.7896                           | 23.64 ± 5.74                                               | 2.4                      | 0.0097                           | 28.18 ± 5.86                                               | 2.9                      | 0.0010                           | 45.28 ± 6.47                                               | 4.6                      | <0.0001                          |
| Chr2              | 2.63 ± 1.03                                                | 2.42 ± 0.84                                                | 0.9                      | 0.9996                           | 6.87 ± 1.66                                                | 2.6                      | 0.3570                           | 4.78 ± 1.63                                                | 1.8                      | 0.6473                           | 17.62 ± 4.60                                               | 6.7                      | 0.0010                           | 30.70 ± 8.09                                               | 11.7                     | <0.0001                          |
| Chr3              | 3.97 ± 1.79                                                | 6.18 ± 1.28                                                | 1.6                      | 0.9429                           | 7.04 ± 1.25                                                | 1.8                      | 0.9090                           | 8.98 ± 1.89                                                | 2.3                      | 0.5024                           | 15.88 ± 2.79                                               | 4.0                      | 0.0113                           | 35.23 ± 8.91                                               | 8.9                      | <0.0001                          |
| Chr4              | 5.59 ± 2.76                                                | 4.74 ± 2.01                                                | 0.8                      | 0.9993                           | 7.01 ± 1.90                                                | 1.3                      | 0.9089                           | 15.13 ± 1.96                                               | 2.7                      | 0.0282                           | 26.93 ± 2.22                                               | 4.8                      | 0.0001                           | 39.43 ± 7.87                                               | 7.1                      | <0.0001                          |
| Chr5              | 6.49 ± 1.59                                                | 5.46 ± 1.86                                                | 0.8                      | 0.9850                           | 4.82 ± 1.66                                                | 0.7                      | 0.9964                           | 9.39 ± 0.42                                                | 1.4                      | 0.7252                           | 17.43 ± 3.19                                               | 2.7                      | 0.0153                           | 42.63 ± 5.68                                               | 6.6                      | <0.0001                          |
| Chr6              | 5.21 ± 2.90                                                | 2.00 ± 1.30                                                | 0.4                      | 0.7553                           | 4.84 ± 1.06                                                | 0.9                      | 1.0000                           | 7.86 ± 0.52                                                | 1.5                      | 0.8318                           | 15.32 ± 4.15                                               | 2.9                      | 0.0269                           | 32.38 ± 8.14                                               | 6.2                      | <0.0001                          |
| Chr7              | 2.26 ± 0.90                                                | 3.15 ± 1.19                                                | 1.4                      | 0.9871                           | 9.21 ± 1.12                                                | 4.1                      | 0.0454                           | 11.43 ± 2.15                                               | 5.1                      | 0.0125                           | 14.56 ± 4.26                                               | 6.4                      | 0.0016                           | 29.85 ± 7.51                                               | 13.2                     | <0.0001                          |
| Chr8              | 4.52 ± 1.51                                                | 4.30 ± 2.59                                                | 1.0                      | 1.0000                           | 7.09 ± 1.11                                                | 1.6                      | 0.9638                           | 7.72 ± 1.45                                                | 1.7                      | 0.8537                           | 27.38 ± 3.01                                               | 6.1                      | 0.0001                           | 39.25 ± 6.63                                               | 8.7                      | <0.0001                          |
| Chr9              | 6.71 ± 0.73                                                | 7.92 ± 3.11                                                | 1.2                      | 0.9993                           | 12.33 ± 2.56                                               | 1.8                      | 0.2567                           | 11.25 ± 2.00                                               | 1.7                      | 0.4410                           | 29.98 ± 4.61                                               | 4.5                      | < 0.0001                         | 32.43 ± 4.93                                               | 4.8                      | <0.0001                          |
| Chr10             | 7.10 ± 1.18                                                | 5.30 ± 2.78                                                | 0.7                      | 0.9913                           | 3.28 ± 0.70                                                | 0.5                      | 0.4860                           | 11.61 ± 3.75                                               | 1.6                      | 0.6971                           | 11.09 ± 2.05                                               | 1.6                      | 0.7661                           | 24.75 ± 3.71                                               | 3.5                      | 0.0014                           |
| Chr11             | 10.46 ± 4.19                                               | 8.65 ± 2.48                                                | 0.8                      | 1.0000                           | 6.57 ± 0.99                                                | 0.6                      | 0.8447                           | 18.65 ± 1.62                                               | 1.8                      | 0.1140                           | 29.75 ± 3.68                                               | 2.8                      | 0.0005                           | 37.95 ± 7.50                                               | 3.6                      | <0.0001                          |
| Chr12             | 2.12 ± 0.72                                                | 6.63 ± 1.52                                                | 3.1                      | 0.5879                           | 7.94 ± 1.25                                                | 3.7                      | 0.2260                           | 9.33 ± 2.56                                                | 4.4                      | 0.0684                           | 23.53 ± 5.03                                               | 11.1                     | 0.0001                           | 38.20 ± 4.77                                               | 18.0                     | <0.0001                          |
| Chr13             | 3.12 ± 1.49                                                | 3.07 ± 1.84                                                | 1.0                      | 0.9999                           | 3.81 ± 1.67                                                | 1.2                      | 0.9844                           | 8.84 ± 3.01                                                | 2.8                      | 0.1332                           | 9.67 ± 1.18                                                | 3.1                      | 0.0789                           | 17.00 ± 1.72                                               | 5.4                      | 0.0013                           |
| Chr14             | 10.09 ± 2.96                                               | 9.40 ± 3.54                                                | 0.9                      | 0.9879                           | 9.59 ± 2.01                                                | 1.0                      | 1.0000                           | 14.90 ± 3.13                                               | 1.5                      | 0.5698                           | 29.23 ± 4.65                                               | 2.9                      | 0.0011                           | 63.35 ± 12.50                                              | 6.3                      | <0.0001                          |
| Chr15             | 3.16 ± 2.46                                                | 3.51 ± 2.13                                                | 1.1                      | 0.9964                           | 3.77 ± 1.00                                                | 1.2                      | 0.9938                           | 7.67 ± 2.81                                                | 2.4                      | 0.3084                           | 16.18 ± 1.36                                               | 5.1                      | 0.0019                           | 30.10 ± 4.28                                               | 9.5                      | <0.0001                          |
| Chr16             | 2.02 ± 0.68                                                | 6.87 ± 3.22                                                | 3.4                      | 0.4963                           | 12.29 ± 2.10                                               | 6.1                      | 0.0225                           | 12.86 ± 6.65                                               | 6.4                      | 0.0496                           | 24.50 ± 4.35                                               | 12.1                     | 0.0001                           | 38.85 ± 3.96                                               | 19.2                     | <0.0001                          |
| Chr17             | 4.43 ± 1.85                                                | 12.65 ± 2.01                                               | 2.9                      | 0.1781                           | 12.27 ± 3.76                                               | 2.8                      | 0.1835                           | 5.03 ± 1.85                                                | 1.1                      | 0.9972                           | 29.05 ± 4.35                                               | 6.6                      | < 0.0001                         | 42.50 ± 5.09                                               | 9.6                      | <0.0001                          |
| Chr18             | 7.94 ± 3.88                                                | 8.18 ± 1.92                                                | 1.0                      | 1.0000                           | 11.42 ± 2.33                                               | 1.4                      | 0.7965                           | 12.58 ± 1.50                                               | 1.6                      | 0.5288                           | 33.00 ± 7.80                                               | 4.2                      | < 0.0001                         | 44.88 ± 4.12                                               | 5.7                      | <0.0001                          |
| Chr19             | 6.78 ± 0.90                                                | 5.33 ± 1.17                                                | 0.8                      | 0.9893                           | 9.62 ± 2.38                                                | 1.4                      | 0.7218                           | 8.28 ± 2.36                                                | 1.2                      | 0.9669                           | 18.98 ± 3.27                                               | 2.8                      | 0.0123                           | 19.98 ± 1.78                                               | 2.9                      | 0.0063                           |

<sup>1</sup> Minimum mutation frequency considering unique mutations within a respective locus.

<sup>2</sup> Fold-change of minimum mutation frequency versus 0 mg/kg/day BbF.

<sup>3</sup> Pairwise comparison to 0 mg/kg/day BbF of the respective locus by GLMM, significant if *p* < 0.05.

**Table S7.** Minimum mutation frequencies of single base substitutions detected in bone marrow and liver samples after exposure to increasing doses of BbF.

| Mutation Subtype | 0 mg/kg/day                                                |                                                            |                          |                                  | 6.25 mg/kg/day                                             |                          |                                  |                                                            | 12.5 mg/kg/day           |                                  |                                                            |                          | 25 mg/kg/day                     |                                                            |                          |                                  | 50 mg/kg/day                                               |                          |                                  |  | 100 mg/kg/day |  |  |  |
|------------------|------------------------------------------------------------|------------------------------------------------------------|--------------------------|----------------------------------|------------------------------------------------------------|--------------------------|----------------------------------|------------------------------------------------------------|--------------------------|----------------------------------|------------------------------------------------------------|--------------------------|----------------------------------|------------------------------------------------------------|--------------------------|----------------------------------|------------------------------------------------------------|--------------------------|----------------------------------|--|---------------|--|--|--|
|                  | MF <sub>min</sub> <sup>1</sup> ± SEM (x 10 <sup>-8</sup> ) | MF <sub>min</sub> <sup>1</sup> ± SEM (x 10 <sup>-8</sup> ) | Fold-change <sup>2</sup> | Adj. <i>p</i> value <sup>3</sup> | MF <sub>min</sub> <sup>1</sup> ± SEM (x 10 <sup>-8</sup> ) | Fold-change <sup>2</sup> | Adj. <i>p</i> value <sup>3</sup> | MF <sub>min</sub> <sup>1</sup> ± SEM (x 10 <sup>-8</sup> ) | Fold-change <sup>2</sup> | Adj. <i>p</i> value <sup>3</sup> | MF <sub>min</sub> <sup>1</sup> ± SEM (x 10 <sup>-8</sup> ) | Fold-change <sup>2</sup> | Adj. <i>p</i> value <sup>3</sup> | MF <sub>min</sub> <sup>1</sup> ± SEM (x 10 <sup>-8</sup> ) | Fold-change <sup>2</sup> | Adj. <i>p</i> value <sup>3</sup> | MF <sub>min</sub> <sup>1</sup> ± SEM (x 10 <sup>-8</sup> ) | Fold-change <sup>2</sup> | Adj. <i>p</i> value <sup>3</sup> |  |               |  |  |  |
| Bone marrow      |                                                            |                                                            |                          |                                  |                                                            |                          |                                  |                                                            |                          |                                  |                                                            |                          |                                  |                                                            |                          |                                  |                                                            |                          |                                  |  |               |  |  |  |
| C:G>A:T          | 2.08 ± 0.40                                                | 3.28 ± 0.89                                                | 1.6                      | 0.7761                           | 5.48 ± 0.76                                                | 2.6                      | 0.0184                           | 4.17 ± 0.32                                                | 2.0                      | 0.0912                           | 8.84 ± 1.32                                                | 4.3                      | 0.0002                           | 12.78 ± 1.41                                               | 6.1                      | <0.0001                          |                                                            |                          |                                  |  |               |  |  |  |
| C:G>G:C          | 0.39 ± 0.23                                                | 0.86 ± 0.45                                                | 2.2                      | 0.0340                           | 1.45 ± 0.16                                                | 3.7                      | 0.0340                           | 1.48 ± 0.16                                                | 3.8                      | 0.0523                           | 1.61 ± 0.17                                                | 4.1                      | 0.0189                           | 2.50 ± 0.29                                                | 6.4                      | 0.0013                           |                                                            |                          |                                  |  |               |  |  |  |
| C:G>T:A          | 2.34 ± 0.24                                                | 2.79 ± 0.67                                                | 1.2                      | 0.9935                           | 2.59 ± 0.64                                                | 1.1                      | 0.9998                           | 3.90 ± 0.30                                                | 1.7                      | 0.2643                           | 5.63 ± 0.91                                                | 2.4                      | 0.0037                           | 7.84 ± 0.81                                                | 3.4                      | 0.0001                           |                                                            |                          |                                  |  |               |  |  |  |
| T:A>A:T          | 0.26 ± 0.13                                                | 0.45 ± 0.10                                                | 1.7                      | 0.8744                           | 1.17 ± 0.16                                                | 4.5                      | 0.0489                           | 1.76 ± 0.42                                                | 6.8                      | 0.0103                           | 2.04 ± 0.16                                                | 7.8                      | 0.0044                           | 2.28 ± 0.56                                                | 8.8                      | 0.0027                           |                                                            |                          |                                  |  |               |  |  |  |
| T:A>C:G          | 0.95 ± 0.15                                                | 1.44 ± 0.35                                                | 1.5                      | 0.9263                           | 1.24 ± 0.33                                                | 1.3                      | 0.8778                           | 1.65 ± 0.24                                                | 1.7                      | 0.6433                           | 2.15 ± 0.57                                                | 2.3                      | 0.0439                           | 1.75 ± 0.43                                                | 1.8                      | 0.2853                           |                                                            |                          |                                  |  |               |  |  |  |
| T:A>G:C          | 0.35 ± 0.05                                                | 0.61 ± 0.15                                                | 1.7                      | 0.5553                           | 0.98 ± 0.11                                                | 2.8                      | 0.0052                           | 0.62 ± 0.09                                                | 1.8                      | 0.2107                           | 0.81 ± 0.17                                                | 2.3                      | 0.0169                           | 0.81 ± 0.11                                                | 2.3                      | 0.0168                           |                                                            |                          |                                  |  |               |  |  |  |
| Insertion        | 0.12 ± 0.08                                                | 0.10 ± 0.06                                                | 0.8                      | 1.0000                           | 0.17 ± 0.07                                                | 1.4                      | 0.9570                           | 0.24 ± 0.09                                                | 2.0                      | 0.9409                           | 0.32 ± 0.08                                                | 2.7                      | 0.3450                           | 0.21 ± 0.07                                                | 1.8                      | 0.7503                           |                                                            |                          |                                  |  |               |  |  |  |
| Deletion         | 0.95 ± 0.17                                                | 0.70 ± 0.17                                                | 0.7                      | 0.8069                           | 0.99 ± 0.05                                                | 1.0                      | 0.9996                           | 1.05 ± 0.08                                                | 1.1                      | 0.9949                           | 1.28 ± 0.22                                                | 1.3                      | 0.7746                           | 1.03 ± 0.26                                                | 1.1                      | 0.9999                           |                                                            |                          |                                  |  |               |  |  |  |
| MNV <sup>4</sup> | 0.06 ± 0.03                                                | 0.28 ± 0.14                                                | 4.6                      | 0.5715                           | 0.26 ± 0.18                                                | 4.3                      | 0.6452                           | 0.19 ± 0.08                                                | 3.2                      | 0.5672                           | 0.20 ± 0.05                                                | 3.3                      | 0.6186                           | 0.41 ± 0.04                                                | 6.8                      | 0.1553                           |                                                            |                          |                                  |  |               |  |  |  |
| Liver            |                                                            |                                                            |                          |                                  |                                                            |                          |                                  |                                                            |                          |                                  |                                                            |                          |                                  |                                                            |                          |                                  |                                                            |                          |                                  |  |               |  |  |  |
| C:G>A:T          | 1.21 ± 0.29                                                | 2.53 ± 0.46                                                | 2.1                      | 0.8117                           | 3.85 ± 0.15                                                | 3.2                      | 0.4030                           | 9.03 ± 0.76                                                | 7.5                      | 0.0319                           | 21.38 ± 4.07                                               | 17.7                     | 0.0009                           | 35.48 ± 5.62                                               | 29.3                     | 0.0001                           |                                                            |                          |                                  |  |               |  |  |  |
| C:G>G:C          | 0.38 ± 0.20                                                | 0.44 ± 0.20                                                | 1.2                      | 1.0000                           | 1.26 ± 0.33                                                | 3.3                      | 0.4026                           | 2.31 ± 0.69                                                | 6.1                      | 0.0541                           | 4.56 ± 0.79                                                | 12.0                     | 0.0055                           | 7.77 ± 0.94                                                | 20.4                     | 0.0007                           |                                                            |                          |                                  |  |               |  |  |  |
| C:G>T:A          | 4.75 ± 0.57                                                | 4.88 ± 1.29                                                | 1.0                      | 0.9910                           | 5.53 ± 0.75                                                | 1.2                      | 0.9015                           | 5.34 ± 0.57                                                | 1.1                      | 0.9964                           | 10.41 ± 0.85                                               | 2.2                      | 0.0043                           | 16.53 ± 1.37                                               | 3.5                      | <0.0001                          |                                                            |                          |                                  |  |               |  |  |  |
| T:A>A:T          | 0.87 ± 0.18                                                | 0.75 ± 0.33                                                | 0.9                      | 0.9617                           | 1.36 ± 0.34                                                | 1.6                      | 0.8657                           | 2.47 ± 0.21                                                | 2.8                      | 0.1372                           | 4.42 ± 0.55                                                | 5.1                      | 0.0034                           | 7.52 ± 1.04                                                | 8.6                      | 0.0034                           |                                                            |                          |                                  |  |               |  |  |  |
| T:A>C:G          | 1.05 ± 0.30                                                | 1.00 ± 0.38                                                | 1.0                      | 0.9935                           | 1.54 ± 0.11                                                | 1.5                      | 0.6879                           | 1.32 ± 0.09                                                | 1.3                      | 0.9461                           | 2.22 ± 0.33                                                | 2.1                      | 0.0909                           | 3.47 ± 0.51                                                | 3.3                      | 0.0016                           |                                                            |                          |                                  |  |               |  |  |  |
| T:A>G:C          | 0.40 ± 0.17                                                | 0.65 ± 0.14                                                | 1.6                      | 0.8476                           | 0.62 ± 0.08                                                | 1.6                      | 0.8725                           | 0.80 ± 0.30                                                | 2.0                      | 0.6951                           | 0.96 ± 0.1                                                 | 2.4                      | 0.3025                           | 1.66 ± 0.32                                                | 4.2                      | 0.0137                           |                                                            |                          |                                  |  |               |  |  |  |
| Insertion        | 0.24 ± 0.07                                                | 0.12 ± 0.05                                                | 0.5                      | 0.9145                           | 0.36 ± 0.16                                                | 1.5                      | 0.8505                           | 0.23 ± 0.04                                                | 1.0                      | 1.0000                           | 0.25 ± 0.1                                                 | 1.0                      | 0.9986                           | 0.45 ± 0.03                                                | 1.9                      | 0.5266                           |                                                            |                          |                                  |  |               |  |  |  |
| Deletion         | 0.81 ± 0.27                                                | 0.67 ± 0.16                                                | 0.8                      | 1.0000                           | 0.76 ± 0.07                                                | 0.9                      | 1.0000                           | 0.67 ± 0.23                                                | 0.8                      | 0.9999                           | 1.00 ± 0.13                                                | 1.2                      | 0.9244                           | 1.65 ± 0.33                                                | 2.0                      | 0.0609                           |                                                            |                          |                                  |  |               |  |  |  |
| MNV <sup>4</sup> | 0.14 ± 0.14                                                | 0.15 ± 0.01                                                | 1.1                      | 0.9975                           | 0.20 ± 0.04                                                | 1.4                      | 0.9325                           | 0.39 ± 0.08                                                | 2.8                      | 0.2172                           | 0.68 ± 0.09                                                | 4.9                      | 0.0298                           | 1.06 ± 0.09                                                | 7.6                      | 0.0039                           |                                                            |                          |                                  |  |               |  |  |  |

<sup>1</sup> Minimum mutation frequency considering unique mutations.<sup>2</sup> Fold-change of minimum mutation frequency versus 0 mg/kg/day BbF.<sup>3</sup> Pairwise comparison to 0 mg/kg/day BbF by GLMM, significant if *p* < 0.05.<sup>4</sup> Multi-nucleotide variants.



**Table S8.** Benchmark doses of measured genotoxic endpoints in blood, bone marrow and liver.

| Genotoxic endpoint | n | CES <sup>1</sup> | BMDL <sup>2</sup> | BMDU <sup>3</sup> | Log10 BMDL | Log10 BMDU | Bootstrap runs |
|--------------------|---|------------------|-------------------|-------------------|------------|------------|----------------|
| MN RET             | 8 | 0.5              | 0.408             | 4.06              | -0.3893    | 0.6085     | 200            |
| MN RBC             | 8 | 0.5              | 2.23              | 9.34              | 0.3483     | 0.9703     | 200            |
| MF BM              | 4 | 0.5              | 3.6               | 12.8              | 0.5563     | 1.1072     | 200            |
| MFLiver            | 4 | 0.5              | 10.1              | 18.4              | 1.0043     | 1.2648     | 200            |

<sup>1</sup>Critical effect size used to perform benchmark dose modeling.

<sup>2</sup>Benchmark dose lower confidence limit.

<sup>3</sup>Benchmark dose upper confidence limit.

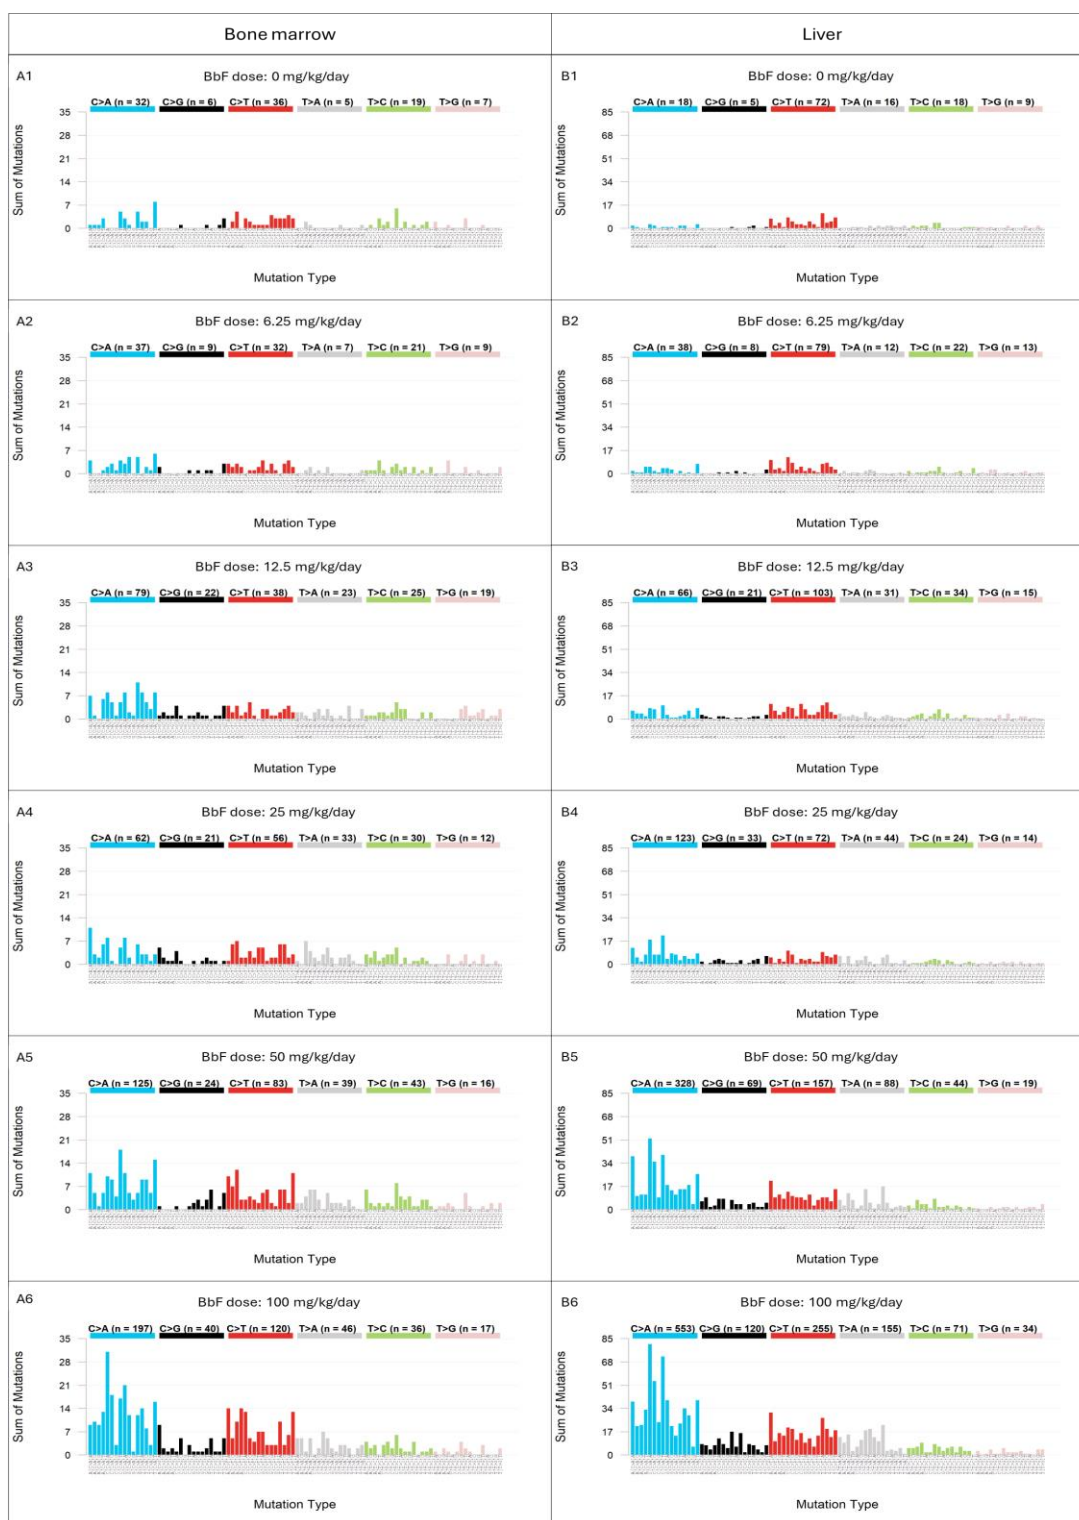

**Figure S1.** Trinucleotide mutation pattern of bone marrow (A) and liver (B) samples after 28-day exposure to the vehicle control (A1, B1) and increasing doses of BbF (A2 = 6.25, A3 = 12.5, A4 = 25, A5 = 50, A6 = 100, B2 = 6.25, B3 = 12.5, B4 = 25, B5 = 50 and B6 = 100 mg/kg/day). The panels represent the sum of mutations of each 96-mutational subtypes for n = 4 samples of each dose group. The sum of all mutation for each single base substitution type; C>A (blue), C>G (black), C>T (red), T>A (gray), T>C (green) and T>G (pink), are indicated.

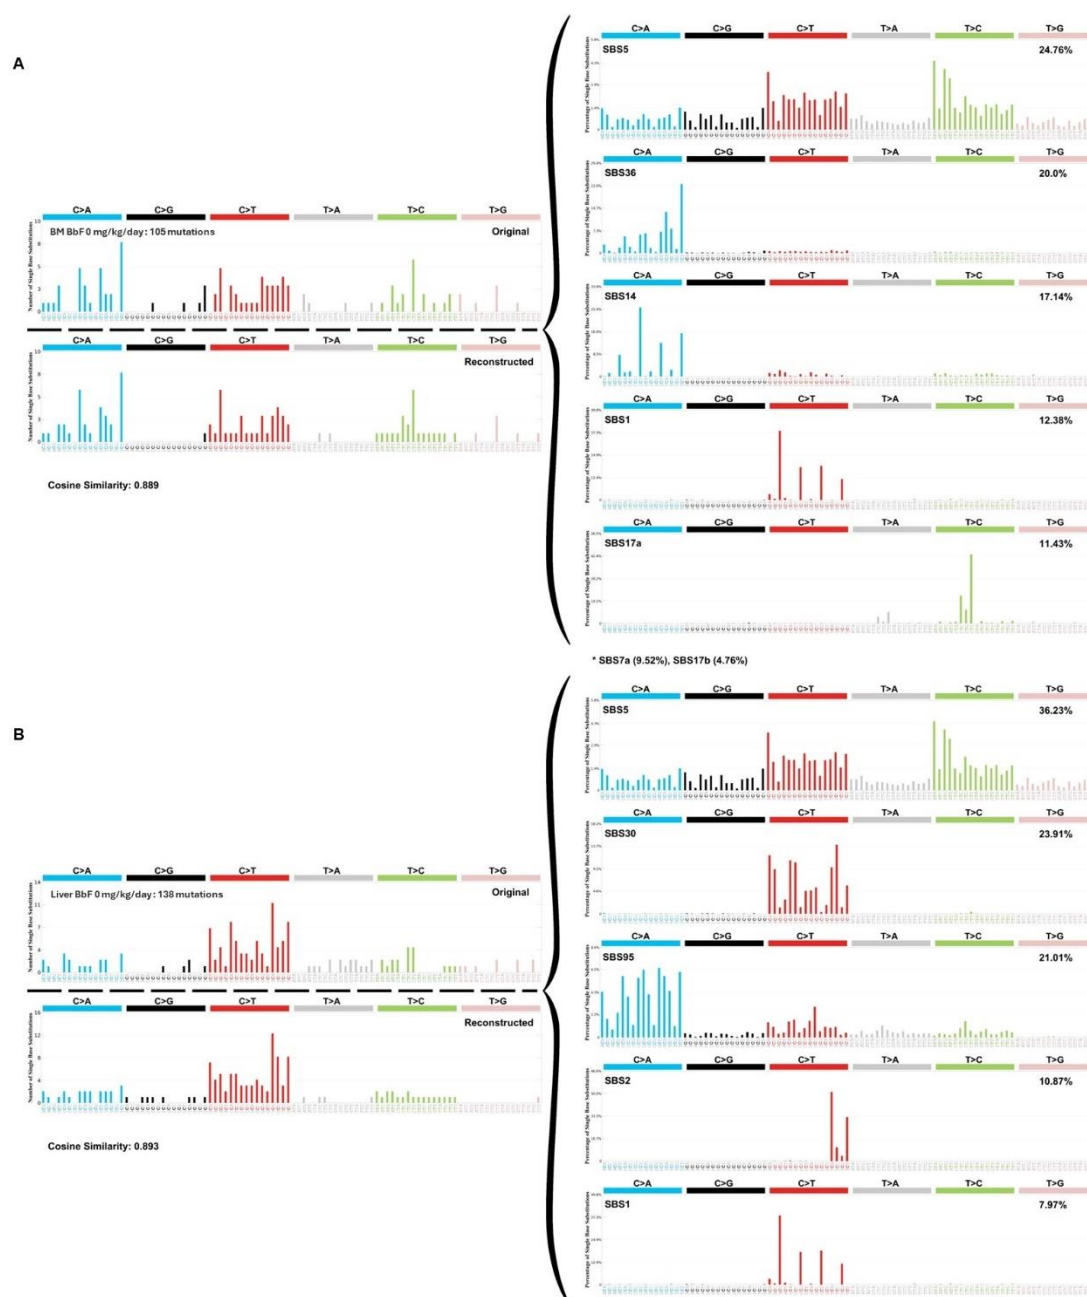

**Figure S2.** Mutation signature analyses for vehicle control in bone marrow (A) and liver (B). The original trinucleotide mutation profile is shown on the top left. SigProfilerAssignment used the single base substitution (SBS) signatures of the Catalogue of Somatic Mutations in Cancer (COSMIC) database to reconstruct the signatures. The SBS signatures and their relative contributions are shown on the right. The reconstructed mutation pattern, number of substitutions used for the assignment and cosine similarity between reconstructed and observed trinucleotide mutation profile are shown on left below the original profile. The total amount of mutations of the original signature are indicated on the left.
